# Supplementary material for: Borylated 2,3,4,5-Tetrachlorophthalimide and Their 2,3,4,5-Tetrachlorobenzamide Analogues: Synthesis, Their Glycosidase Inhibition and Anticancer Properties in View to Boron Neutron Capture Therapy
Source: MDPI journal article supplement (doi:10.3390/molecules27113447), 2022-05-26
Supplement: s1 [file s1]

## Supporting information

### Borylated 2,3,4,5-tetrachlorophthalimide and their 2,3,4,5-tetrachlorobenzamide analogues: synthesis, their glycosidase inhibition and anticancer properties in view to Boron Neutron Capture Therapy

#### 1. X-Ray crystallography data

##### 1.1. Table S1. Crystal data and structure refinement for meta 5.

|                                   |                                                                                                                                    |
|-----------------------------------|------------------------------------------------------------------------------------------------------------------------------------|
| Empirical formula                 | C <sub>19</sub> H <sub>18</sub> BCl <sub>4</sub> NO <sub>3</sub>                                                                   |
| Molecular mass                    | 460.95 g/mol                                                                                                                       |
| Temperature                       | 190(2) K                                                                                                                           |
| Wavelength                        | 1.54184 Å                                                                                                                          |
| Crystal system                    | Triclinic                                                                                                                          |
| Space group                       | <i>P</i> 1                                                                                                                         |
| Unit cell dimensions              | a = 9.7314(3) Å<br>$\alpha$ = 91.861(3)°<br>b = 13.4344(5) Å<br>$\beta$ = 90.532(3)°<br>c = 17.4745(6) Å<br>$\gamma$ = 111.062(3)° |
| Volume                            | 2130.25(13) Å <sup>3</sup>                                                                                                         |
| Z                                 | 4                                                                                                                                  |
| Density (calculated)              | 1.437 Mg/m <sup>3</sup>                                                                                                            |
| Absorption coefficient            | 5.221 mm <sup>-1</sup>                                                                                                             |
| F(000)                            | 944                                                                                                                                |
| Crystal size                      | 0.2 x 0.2 x 0.2 mm <sup>3</sup>                                                                                                    |
| Theta range for data collection   | 3.53 to 62.49°                                                                                                                     |
| Index ranges                      | -11 ≤ h ≤ 11, -15 ≤ k ≤ 15, -18 ≤ l ≤ 20                                                                                           |
| Reflections collected             | 18829                                                                                                                              |
| Independent reflections           | 6719 [R(int) = 0.0332]                                                                                                             |
| Completeness to theta = 62.49°    | 98.8 %                                                                                                                             |
| Absorption correction             | Semi-empirical from equivalents                                                                                                    |
| Max. and min. transmission        | 1 and 0.63302                                                                                                                      |
| Refinement method                 | Full-matrix least-squares on F <sup>2</sup>                                                                                        |
| Data / restraints / parameters    | 6719 / 0 / 505                                                                                                                     |
| Goodness-of-fit on F <sup>2</sup> | 1.147                                                                                                                              |
| Final R indices [I > 2σ(I)]       | R1 = 0.0470, wR2 = 0.1418                                                                                                          |
| R indices (all data)              | R1 = 0.0555, wR2 = 0.1473                                                                                                          |
| Largest diff. peak and hole       | 0.432 and -0.305 e.Å <sup>-3</sup>                                                                                                 |

**Table S2.** Bond lengths [Å] and angles [°] for meta 5.

|                   |          |
|-------------------|----------|
| C(1A)-C(6A)       | 1.393(5) |
| C(1A)-C(2A)       | 1.398(5) |
| C(1A)-B(1A)       | 1.558(6) |
| C(2A)-C(3A)       | 1.385(5) |
| C(3A)-C(4A)       | 1.390(5) |
| C(3A)-N(1A)       | 1.425(5) |
| C(4A)-C(5A)       | 1.385(6) |
| C(5A)-C(6A)       | 1.393(6) |
| C(7A)-O(1A)       | 1.224(4) |
| C(7A)-N(1A)       | 1.344(5) |
| C(7A)-C(8A)       | 1.514(5) |
| C(8A)-C(13A)      | 1.381(5) |
| C(8A)-C(9A)       | 1.382(5) |
| C(9A)-C(10A)      | 1.393(5) |
| C(9A)-Cl(1A)      | 1.727(4) |
| C(10A)-C(11A)     | 1.393(6) |
| C(10A)-Cl(2A)     | 1.717(4) |
| C(11A)-C(12A)     | 1.380(5) |
| C(11A)-Cl(3A)     | 1.725(4) |
| C(12A)-C(13A)     | 1.381(5) |
| C(12A)-Cl(4A)     | 1.726(4) |
| C(14A)-O(2A)      | 1.464(5) |
| C(14A)-C(16A)     | 1.524(8) |
| C(14A)-C(17A)     | 1.530(7) |
| C(14A)-C(15A)     | 1.550(6) |
| C(15A)-O(3A)      | 1.472(5) |
| C(15A)-C(18A)     | 1.509(6) |
| C(15A)-C(19A)     | 1.518(6) |
| O(2A)-B(1A)       | 1.364(5) |
| O(3A)-B(1A)       | 1.363(5) |
| C(1B)-C(2B)       | 1.395(5) |
| C(1B)-C(6B)       | 1.403(5) |
| C(1B)-B(1B)       | 1.557(6) |
| C(2B)-C(3B)       | 1.379(5) |
| C(3B)-C(4B)       | 1.391(5) |
| C(3B)-N(1B)       | 1.423(5) |
| C(4B)-C(5B)       | 1.382(6) |
| C(5B)-C(6B)       | 1.378(6) |
| C(7B)-O(1B)       | 1.220(5) |
| C(7B)-N(1B)       | 1.351(5) |
| C(7B)-C(8B)       | 1.511(5) |
| C(8B)-C(9B)       | 1.381(5) |
| C(8B)-C(13B)      | 1.389(5) |
| C(9B)-C(10B)      | 1.391(5) |
| C(9B)-Cl(1B)      | 1.726(4) |
| C(10B)-C(11B)     | 1.394(5) |
| C(10B)-Cl(2B)     | 1.726(4) |
| C(11B)-C(12B)     | 1.384(5) |
| C(11B)-Cl(3B)     | 1.722(3) |
| C(12B)-C(13B)     | 1.381(5) |
| C(12B)-Cl(4B)     | 1.724(4) |
| C(14B)-O(2B)      | 1.467(5) |
| C(14B)-C(17B)     | 1.519(7) |
| C(14B)-C(16B)     | 1.523(6) |
| C(14B)-C(15B)     | 1.568(6) |
| C(15B)-O(3B)      | 1.462(5) |
| C(15B)-C(18B)     | 1.511(6) |
| C(15B)-C(19B)     | 1.520(6) |
| O(2B)-B(1B)       | 1.365(5) |
| O(3B)-B(1B)       | 1.357(5) |
| C(6A)-C(1A)-C(2A) | 118.5(3) |
| C(6A)-C(1A)-B(1A) | 122.1(3) |
| C(2A)-C(1A)-B(1A) | 119.3(3) |
| C(3A)-C(2A)-C(1A) | 121.1(3) |

|                      |          |
|----------------------|----------|
| C(2A)-C(3A)-C(4A)    | 119.6(3) |
| C(2A)-C(3A)-N(1A)    | 121.9(3) |
| C(4A)-C(3A)-N(1A)    | 118.5(3) |
| C(5A)-C(4A)-C(3A)    | 120.0(3) |
| C(4A)-C(5A)-C(6A)    | 120.1(4) |
| C(5A)-C(6A)-C(1A)    | 120.5(3) |
| O(1A)-C(7A)-N(1A)    | 125.7(3) |
| O(1A)-C(7A)-C(8A)    | 120.1(3) |
| N(1A)-C(7A)-C(8A)    | 114.1(3) |
| C(13A)-C(8A)-C(9A)   | 119.8(3) |
| C(13A)-C(8A)-C(7A)   | 118.0(3) |
| C(9A)-C(8A)-C(7A)    | 122.1(3) |
| C(8A)-C(9A)-C(10A)   | 120.3(3) |
| C(8A)-C(9A)-Cl(1A)   | 119.4(3) |
| C(10A)-C(9A)-Cl(1A)  | 120.3(3) |
| C(9A)-C(10A)-C(11A)  | 119.6(3) |
| C(9A)-C(10A)-Cl(2A)  | 120.1(3) |
| C(11A)-C(10A)-Cl(2A) | 120.3(3) |
| C(12A)-C(11A)-C(10A) | 119.4(3) |
| C(12A)-C(11A)-Cl(3A) | 120.4(3) |
| C(10A)-C(11A)-Cl(3A) | 120.2(3) |
| C(11A)-C(12A)-C(13A) | 120.8(3) |
| C(11A)-C(12A)-Cl(4A) | 120.7(3) |
| C(13A)-C(12A)-Cl(4A) | 118.6(3) |
| C(8A)-C(13A)-C(12A)  | 120.1(3) |
| O(2A)-C(14A)-C(16A)  | 106.7(4) |
| O(2A)-C(14A)-C(17A)  | 107.7(4) |
| C(16A)-C(14A)-C(17A) | 112.2(4) |
| O(2A)-C(14A)-C(15A)  | 102.7(3) |
| C(16A)-C(14A)-C(15A) | 113.2(4) |
| C(17A)-C(14A)-C(15A) | 113.5(4) |
| O(3A)-C(15A)-C(18A)  | 108.2(3) |
| O(3A)-C(15A)-C(19A)  | 106.7(3) |
| C(18A)-C(15A)-C(19A) | 109.8(4) |
| O(3A)-C(15A)-C(14A)  | 102.3(3) |
| C(18A)-C(15A)-C(14A) | 115.7(4) |
| C(19A)-C(15A)-C(14A) | 113.4(4) |
| C(7A)-N(1A)-C(3A)    | 123.9(3) |
| B(1A)-O(2A)-C(14A)   | 106.9(3) |
| B(1A)-O(3A)-C(15A)   | 106.8(3) |
| O(3A)-B(1A)-O(2A)    | 113.7(3) |
| O(3A)-B(1A)-C(1A)    | 124.0(3) |
| O(2A)-B(1A)-C(1A)    | 122.2(3) |
| C(2B)-C(1B)-C(6B)    | 118.1(3) |
| C(2B)-C(1B)-B(1B)    | 120.2(3) |
| C(6B)-C(1B)-B(1B)    | 121.5(3) |
| C(3B)-C(2B)-C(1B)    | 121.0(3) |
| C(2B)-C(3B)-C(4B)    | 120.0(3) |
| C(2B)-C(3B)-N(1B)    | 122.5(3) |
| C(4B)-C(3B)-N(1B)    | 117.5(3) |
| C(5B)-C(4B)-C(3B)    | 119.7(3) |
| C(6B)-C(5B)-C(4B)    | 120.3(4) |
| C(5B)-C(6B)-C(1B)    | 120.7(3) |
| O(1B)-C(7B)-N(1B)    | 125.6(3) |
| O(1B)-C(7B)-C(8B)    | 120.8(3) |
| N(1B)-C(7B)-C(8B)    | 113.5(3) |
| C(9B)-C(8B)-C(13B)   | 119.3(3) |
| C(9B)-C(8B)-C(7B)    | 122.7(3) |
| C(13B)-C(8B)-C(7B)   | 118.0(3) |
| C(8B)-C(9B)-C(10B)   | 120.2(3) |
| C(8B)-C(9B)-Cl(1B)   | 119.8(3) |
| C(10B)-C(9B)-Cl(1B)  | 119.9(3) |
| C(9B)-C(10B)-C(11B)  | 120.1(3) |
| C(9B)-C(10B)-Cl(2B)  | 120.3(3) |
| C(11B)-C(10B)-Cl(2B) | 119.6(3) |
| C(12B)-C(11B)-C(10B) | 119.3(3) |

|                      |          |
|----------------------|----------|
| C(12B)-C(11B)-Cl(3B) | 120.3(3) |
| C(10B)-C(11B)-Cl(3B) | 120.4(3) |
| C(13B)-C(12B)-C(11B) | 120.2(3) |
| C(13B)-C(12B)-Cl(4B) | 119.0(3) |
| C(11B)-C(12B)-Cl(4B) | 120.7(3) |
| C(12B)-C(13B)-C(8B)  | 120.7(4) |
| O(2B)-C(14B)-C(17B)  | 106.5(3) |
| O(2B)-C(14B)-C(16B)  | 107.7(3) |
| C(17B)-C(14B)-C(16B) | 111.3(4) |
| O(2B)-C(14B)-C(15B)  | 101.9(3) |
| C(17B)-C(14B)-C(15B) | 113.7(4) |
| C(16B)-C(14B)-C(15B) | 114.8(4) |
| O(3B)-C(15B)-C(18B)  | 106.5(3) |
| O(3B)-C(15B)-C(19B)  | 108.3(3) |
| C(18B)-C(15B)-C(19B) | 110.3(3) |
| O(3B)-C(15B)-C(14B)  | 102.0(3) |
| C(18B)-C(15B)-C(14B) | 114.3(3) |
| C(19B)-C(15B)-C(14B) | 114.6(4) |
| C(7B)-N(1B)-C(3B)    | 126.2(3) |
| B(1B)-O(2B)-C(14B)   | 106.9(3) |
| B(1B)-O(3B)-C(15B)   | 107.4(3) |
| O(3B)-B(1B)-O(2B)    | 113.7(3) |
| O(3B)-B(1B)-C(1B)    | 124.0(3) |
| O(2B)-B(1B)-C(1B)    | 122.3(3) |

---

**1.2. Table S3.** Crystal data and structure refinement for **ortho 8**.

|                                   |                                                                                                  |
|-----------------------------------|--------------------------------------------------------------------------------------------------|
| Empirical formula                 | C <sub>20</sub> H <sub>20</sub> BCl <sub>4</sub> NO <sub>3</sub>                                 |
| Molecular mass                    | 474.98                                                                                           |
| Temperature                       | 190(2) K                                                                                         |
| Wavelength                        | 0.71073 Å                                                                                        |
| Crystal system                    | Monoclinic                                                                                       |
| Space group                       | <i>P</i> 2 <sub>1</sub> / <i>c</i>                                                               |
| Unit cell dimensions              | a = 12.4312(9) Å<br>α = 90°<br>b = 18.6894(17) Å<br>β = 93.369(6)°<br>c = 9.2372(7) Å<br>γ = 90° |
| Volume                            | 2142.4(3) Å <sup>3</sup>                                                                         |
| Z                                 | 4                                                                                                |
| Density (calculated)              | 1.473 Mg/m <sup>3</sup>                                                                          |
| Absorption coefficient            | 0.575 mm <sup>-1</sup>                                                                           |
| F(000)                            | 976                                                                                              |
| Crystal size                      | 0.3 x 0.2 x 0.1 mm <sup>3</sup>                                                                  |
| Theta range for data collection   | 3.28 to 25.00°                                                                                   |
| Index ranges                      | -14 ≤ h ≤ 14, -12 ≤ k ≤ 22, -10 ≤ l ≤ 10                                                         |
| Reflections collected             | 8344                                                                                             |
| Independent reflections           | 8344 [R(int) = 0.0000]                                                                           |
| Completeness to theta = 25.00°    | 99.8%                                                                                            |
| Absorption correction             | Semi-empirical from equivalents                                                                  |
| Max. and min. transmission        | 1 and 0.9793                                                                                     |
| Refinement method                 | Full-matrix least-squares on F <sup>2</sup>                                                      |
| Data / restraints / parameters    | 8344 / 0 / 267                                                                                   |
| Goodness-of-fit on F <sup>2</sup> | 0.745                                                                                            |
| Final R indices [I > 2σ(I)]       | R1 = 0.0611, wR2 = 0.1102                                                                        |
| R indices (all data)              | R1 = 0.1694, wR2 = 0.1272                                                                        |
| Largest diff. peak and hole       | 0.498 and -0.309 e.Å <sup>-3</sup>                                                               |

**Table S4.** Bond lengths [Å] and angles [°] for **ortho 8**.

|             |          |
|-------------|----------|
| C(1)-C(6)   | 1.373(5) |
| C(1)-C(2)   | 1.393(5) |
| C(1)-C(7)   | 1.518(5) |
| C(2)-C(3)   | 1.389(5) |
| C(2)-Cl(1)  | 1.716(4) |
| C(3)-C(4)   | 1.389(5) |
| C(3)-Cl(2)  | 1.702(4) |
| C(4)-C(5)   | 1.400(5) |
| C(4)-Cl(3)  | 1.708(4) |
| C(5)-C(6)   | 1.388(5) |
| C(5)-Cl(4)  | 1.723(4) |
| C(7)-O(1)   | 1.222(4) |
| C(7)-N(1)   | 1.314(5) |
| C(8)-N(1)   | 1.460(4) |
| C(8)-C(9)   | 1.509(4) |
| C(9)-C(14)  | 1.389(5) |
| C(9)-C(10)  | 1.398(5) |
| C(10)-C(11) | 1.392(4) |
| C(10)-B(1)  | 1.561(6) |

|                   |          |
|-------------------|----------|
| C(11)-C(12)       | 1.376(5) |
| C(12)-C(13)       | 1.357(5) |
| C(13)-C(14)       | 1.369(5) |
| C(15)-O(2)        | 1.473(4) |
| C(15)-C(18)       | 1.496(6) |
| C(15)-C(17)       | 1.524(7) |
| C(15)-C(16)       | 1.531(5) |
| C(16)-O(3)        | 1.458(4) |
| C(16)-C(19)       | 1.493(5) |
| C(16)-C(20)       | 1.516(6) |
| B(1)-O(2)         | 1.345(5) |
| B(1)-O(3)         | 1.375(5) |
| C(6)-C(1)-C(2)    | 119.3(4) |
| C(6)-C(1)-C(7)    | 120.2(3) |
| C(2)-C(1)-C(7)    | 120.4(4) |
| C(3)-C(2)-C(1)    | 121.2(4) |
| C(3)-C(2)-Cl(1)   | 119.9(3) |
| C(1)-C(2)-Cl(1)   | 118.9(3) |
| C(4)-C(3)-C(2)    | 119.4(3) |
| C(4)-C(3)-Cl(2)   | 120.3(3) |
| C(2)-C(3)-Cl(2)   | 120.3(3) |
| C(3)-C(4)-C(5)    | 119.1(3) |
| C(3)-C(4)-Cl(3)   | 120.4(3) |
| C(5)-C(4)-Cl(3)   | 120.5(3) |
| C(6)-C(5)-C(4)    | 120.7(4) |
| C(6)-C(5)-Cl(4)   | 119.4(3) |
| C(4)-C(5)-Cl(4)   | 119.8(3) |
| C(1)-C(6)-C(5)    | 120.2(4) |
| O(1)-C(7)-N(1)    | 125.3(4) |
| O(1)-C(7)-C(1)    | 118.7(4) |
| N(1)-C(7)-C(1)    | 115.9(4) |
| N(1)-C(8)-C(9)    | 115.7(3) |
| C(14)-C(9)-C(10)  | 119.3(3) |
| C(14)-C(9)-C(8)   | 121.2(4) |
| C(10)-C(9)-C(8)   | 119.5(3) |
| C(11)-C(10)-C(9)  | 117.5(3) |
| C(11)-C(10)-B(1)  | 116.8(4) |
| C(9)-C(10)-B(1)   | 125.6(3) |
| C(12)-C(11)-C(10) | 122.6(4) |
| C(13)-C(12)-C(11) | 118.8(4) |
| C(12)-C(13)-C(14) | 120.7(4) |
| C(13)-C(14)-C(9)  | 121.0(4) |
| O(2)-C(15)-C(18)  | 109.4(3) |
| O(2)-C(15)-C(17)  | 106.5(4) |
| C(18)-C(15)-C(17) | 111.2(4) |
| O(2)-C(15)-C(16)  | 103.0(3) |
| C(18)-C(15)-C(16) | 114.1(4) |
| C(17)-C(15)-C(16) | 112.0(4) |
| O(3)-C(16)-C(19)  | 108.9(3) |
| O(3)-C(16)-C(20)  | 106.2(3) |
| C(19)-C(16)-C(20) | 107.6(4) |
| O(3)-C(16)-C(15)  | 102.5(3) |
| C(19)-C(16)-C(15) | 116.7(4) |
| C(20)-C(16)-C(15) | 114.1(4) |
| O(2)-B(1)-O(3)    | 113.0(4) |
| O(2)-B(1)-C(10)   | 127.3(4) |
| O(3)-B(1)-C(10)   | 119.6(4) |
| C(7)-N(1)-C(8)    | 122.3(3) |
| B(1)-O(2)-C(15)   | 107.2(3) |
| B(1)-O(3)-C(16)   | 107.5(3) |

## 2. NMR Spectra

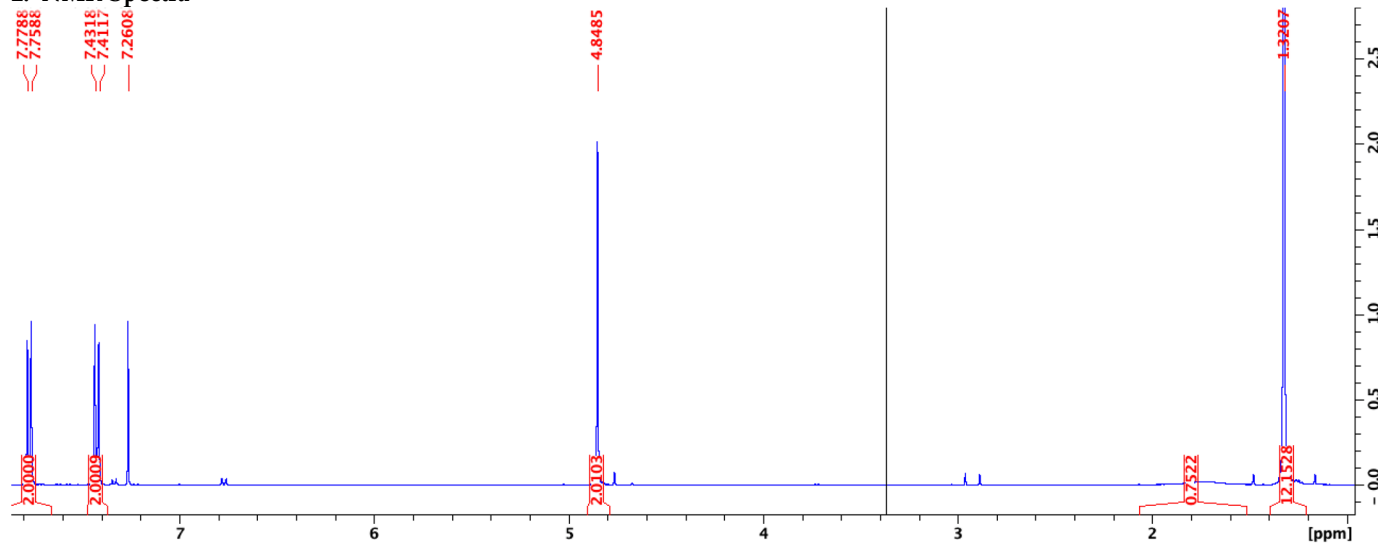

Figure S1. <sup>1</sup>H NMR spectrum of para 3.

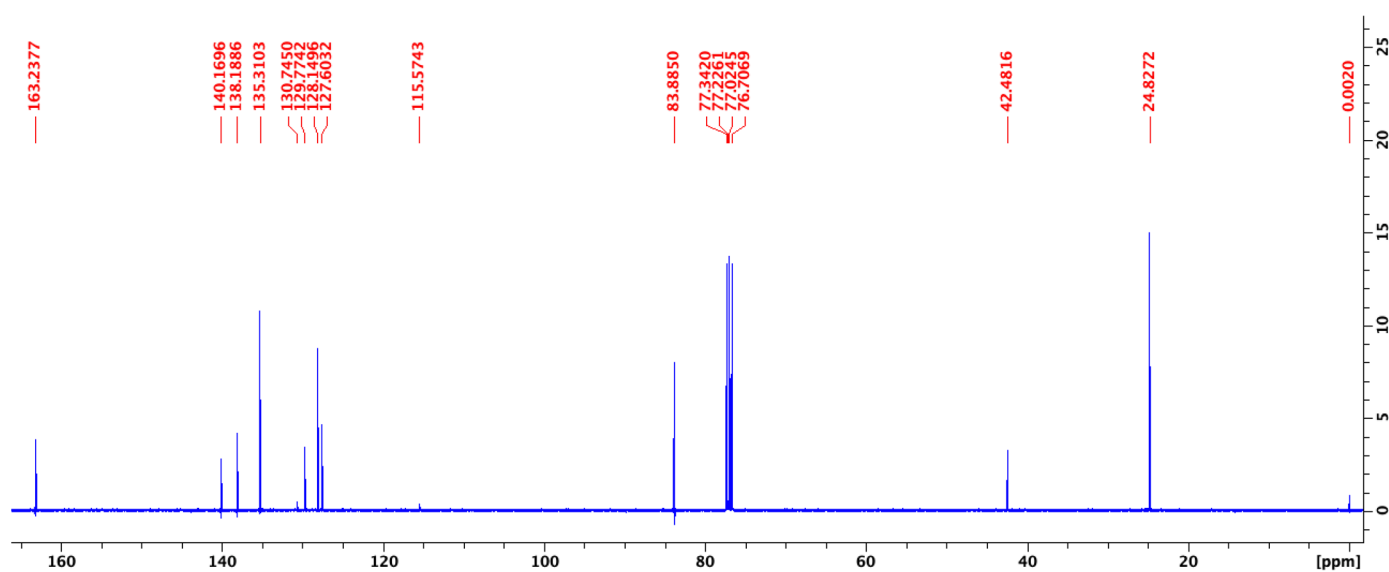

Figure S2. <sup>13</sup>C NMR spectrum of para 3.

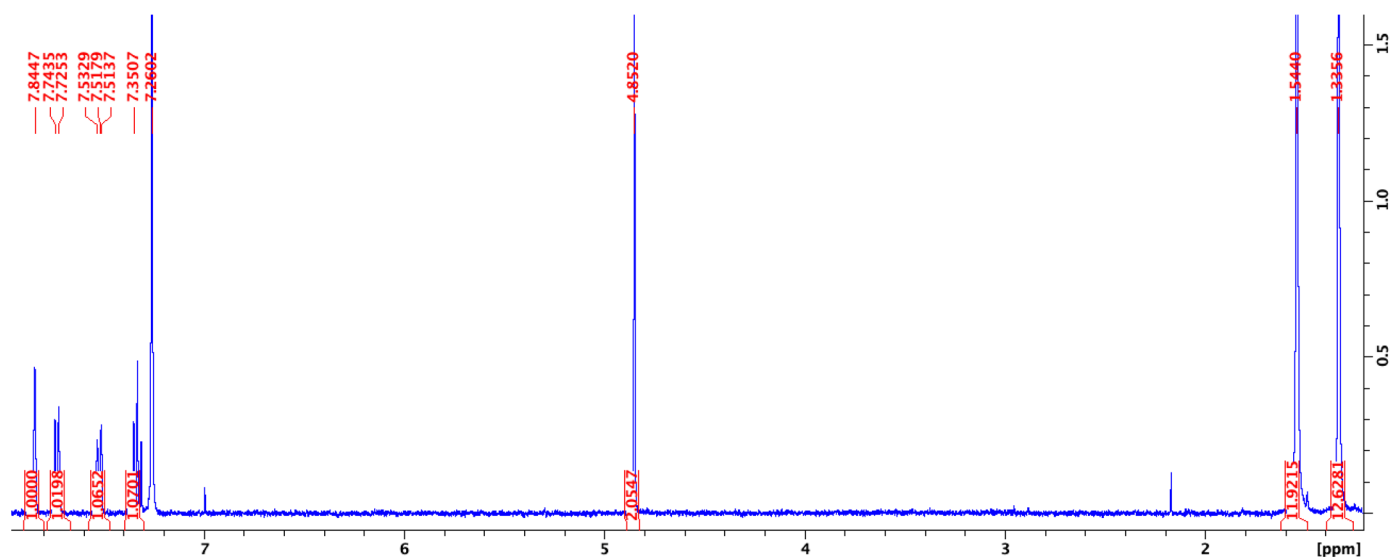

Figure S3. <sup>1</sup>H NMR spectrum of **meta 3**.

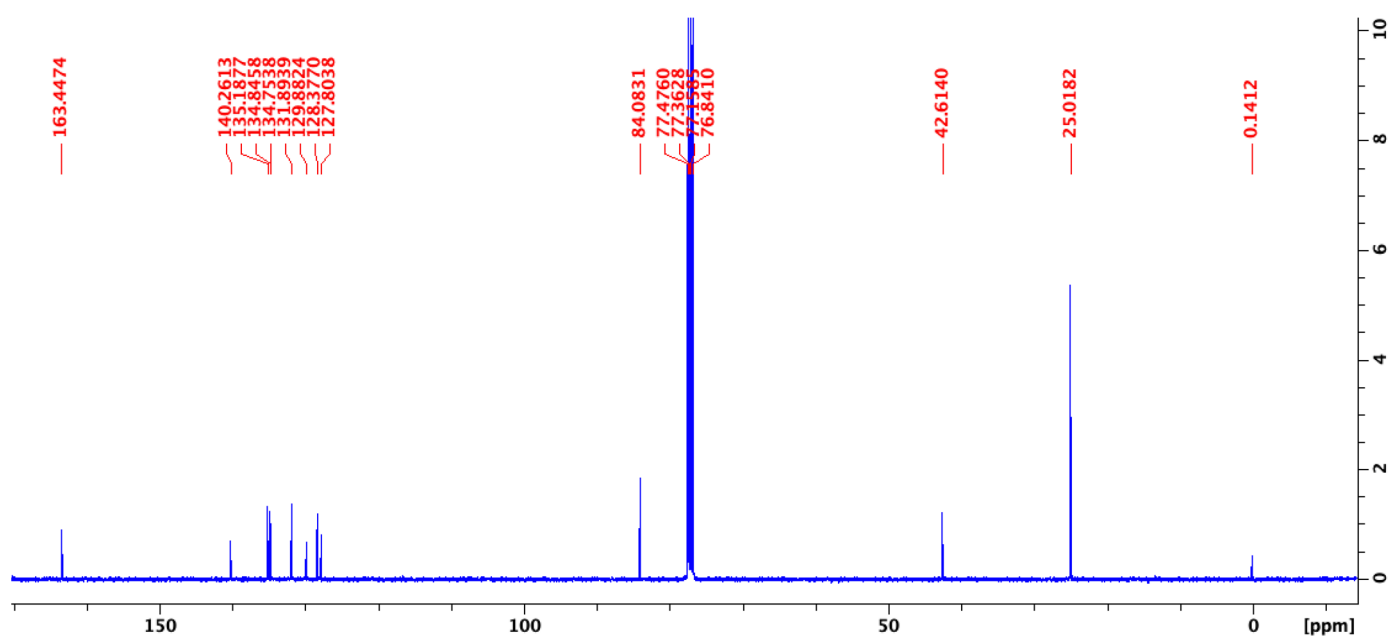

Figure S4. <sup>13</sup>C NMR spectrum of **meta 3**.

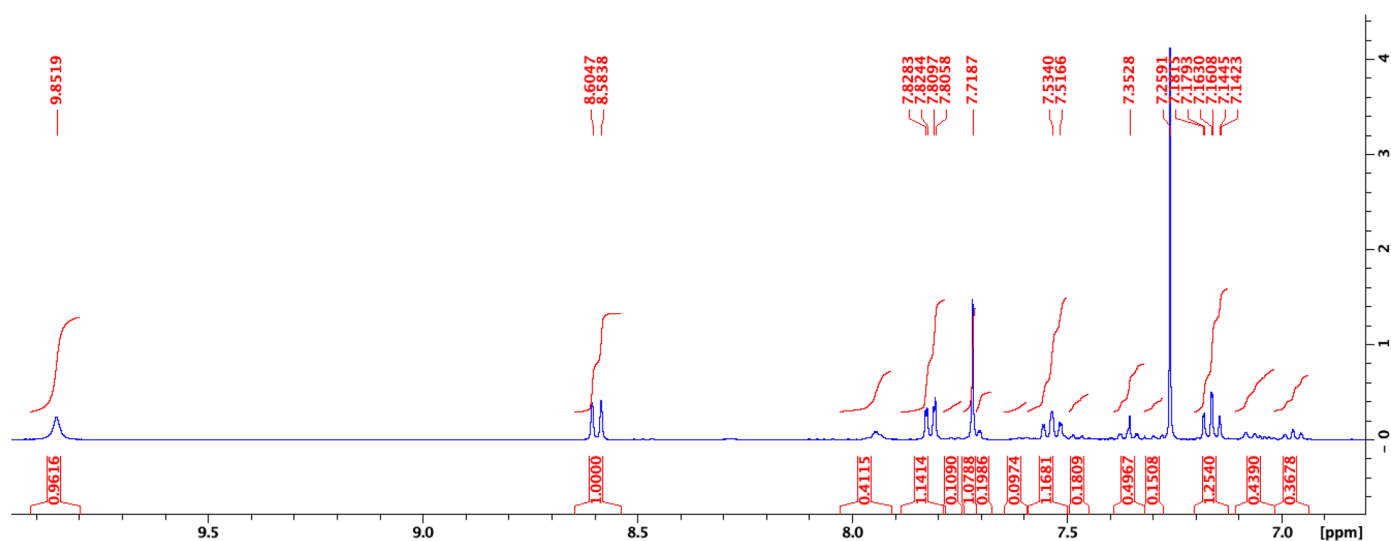

162.3400  
144.0074  
136.7190  
134.6668  
133.2478  
132.7122  
130.2059  
127.8286  
124.1439  
119.6691  
84.8401  
84.5682  
77.4739  
77.1623  
76.8390  
25.0120

[ppm]

**Figure S6.**  $^{13}\text{C}$  NMR spectrum of **ortho 5**.

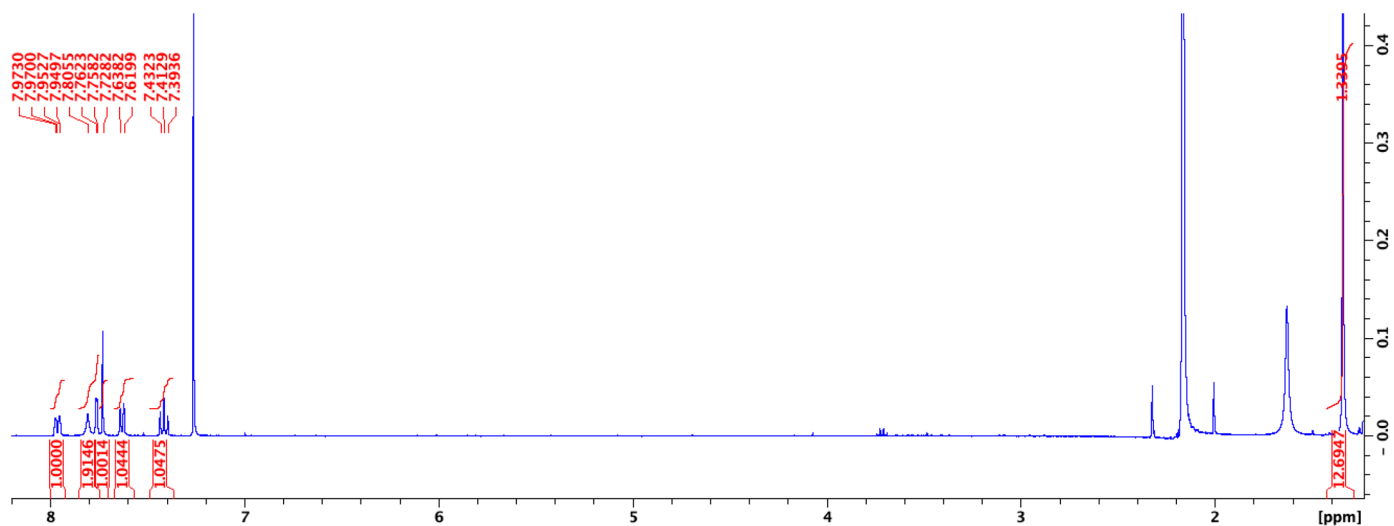

Figure S7. <sup>1</sup>H NMR spectrum of meta 5.

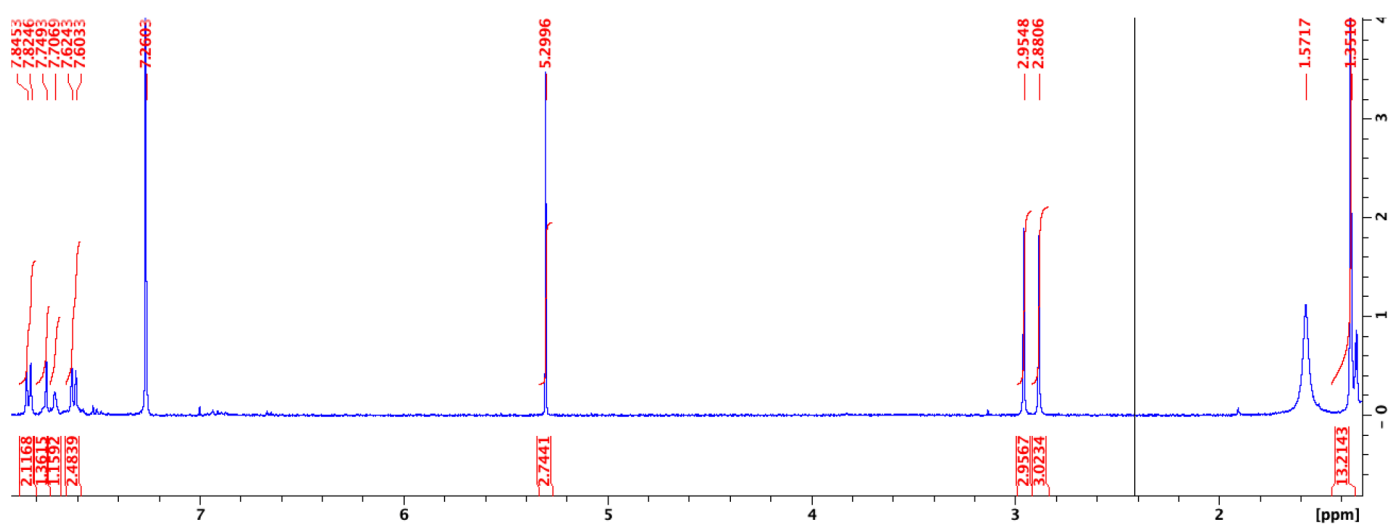

Figure S8. <sup>1</sup>H NMR spectrum of para 5.

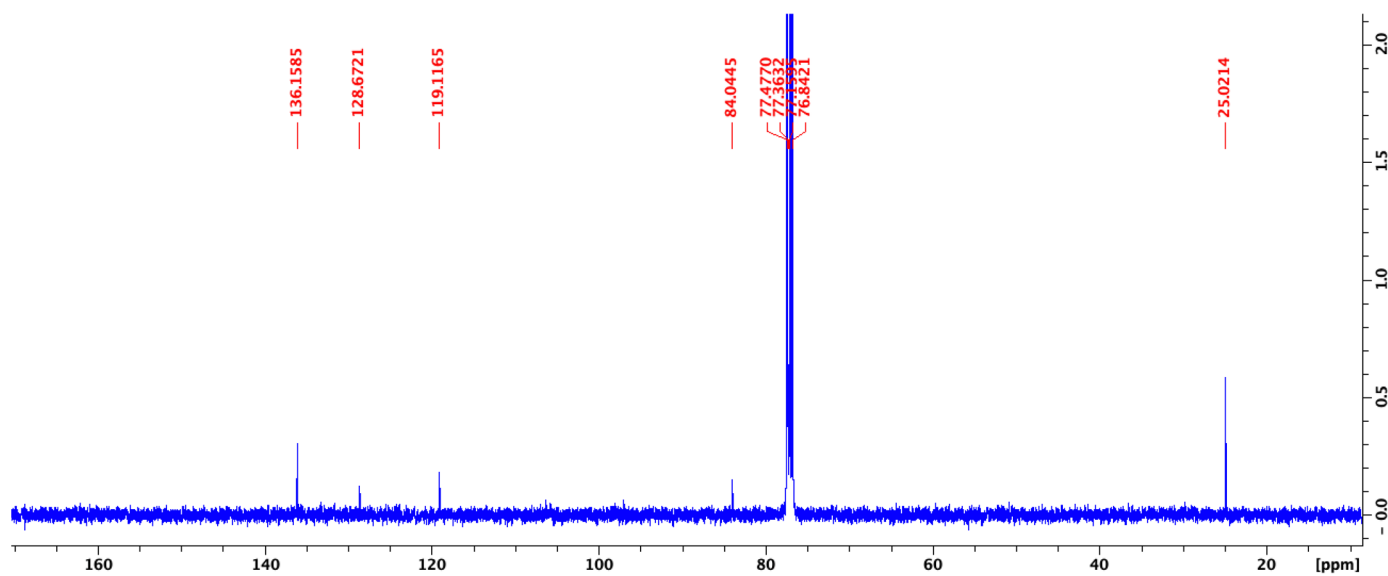

Figure S9. <sup>13</sup>C NMR spectrum of para 5.

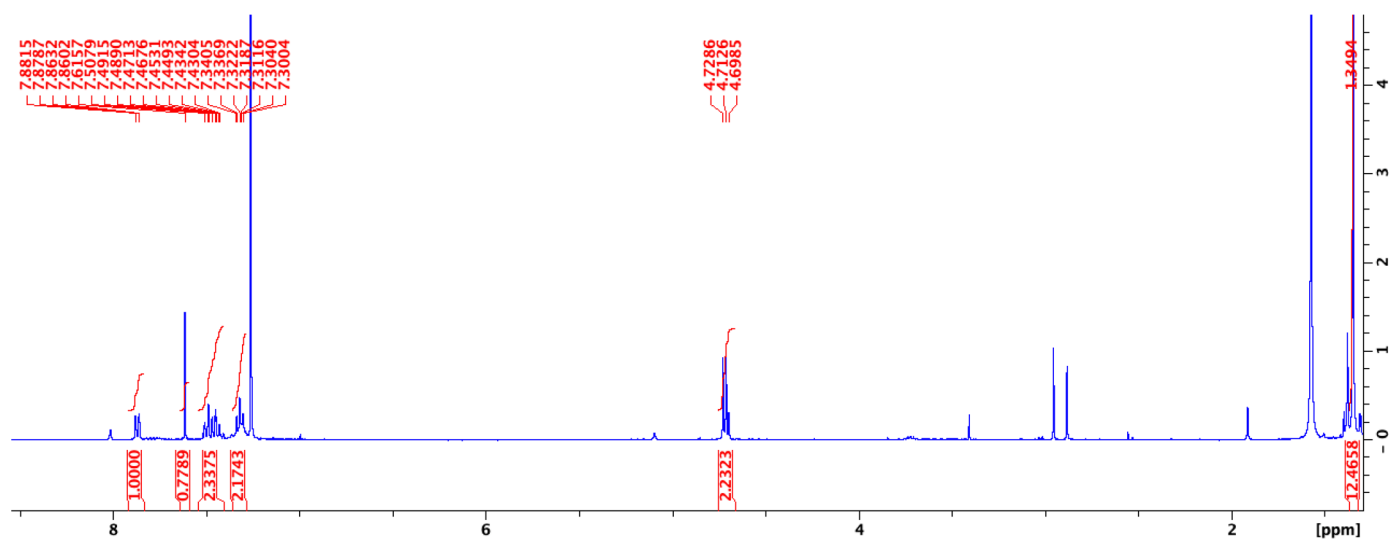

Figure S10. <sup>1</sup>H NMR spectrum of **ortho 8**.

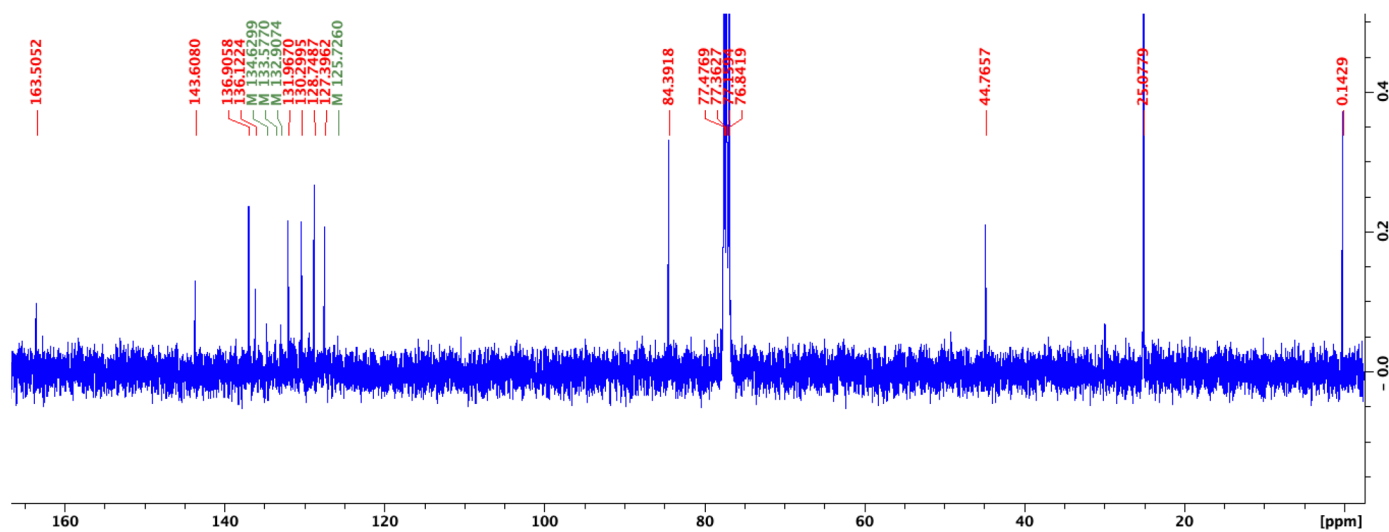

Figure S11. <sup>13</sup>C NMR spectrum of **ortho 8**.



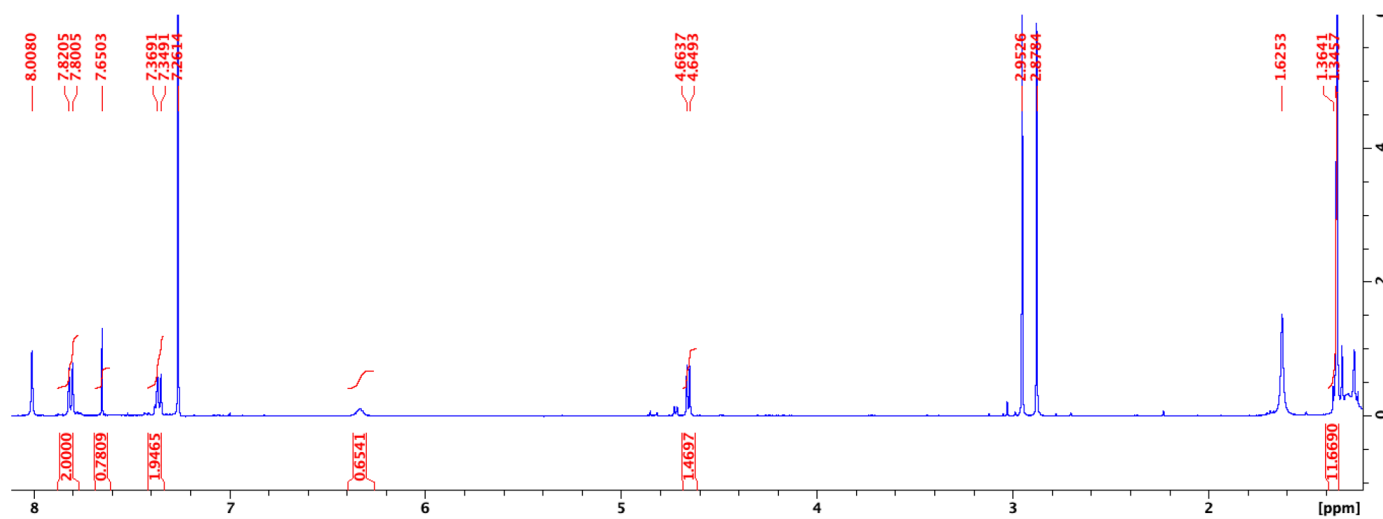

Figure S12.  $^1\text{H}$  NMR spectrum of para 8.

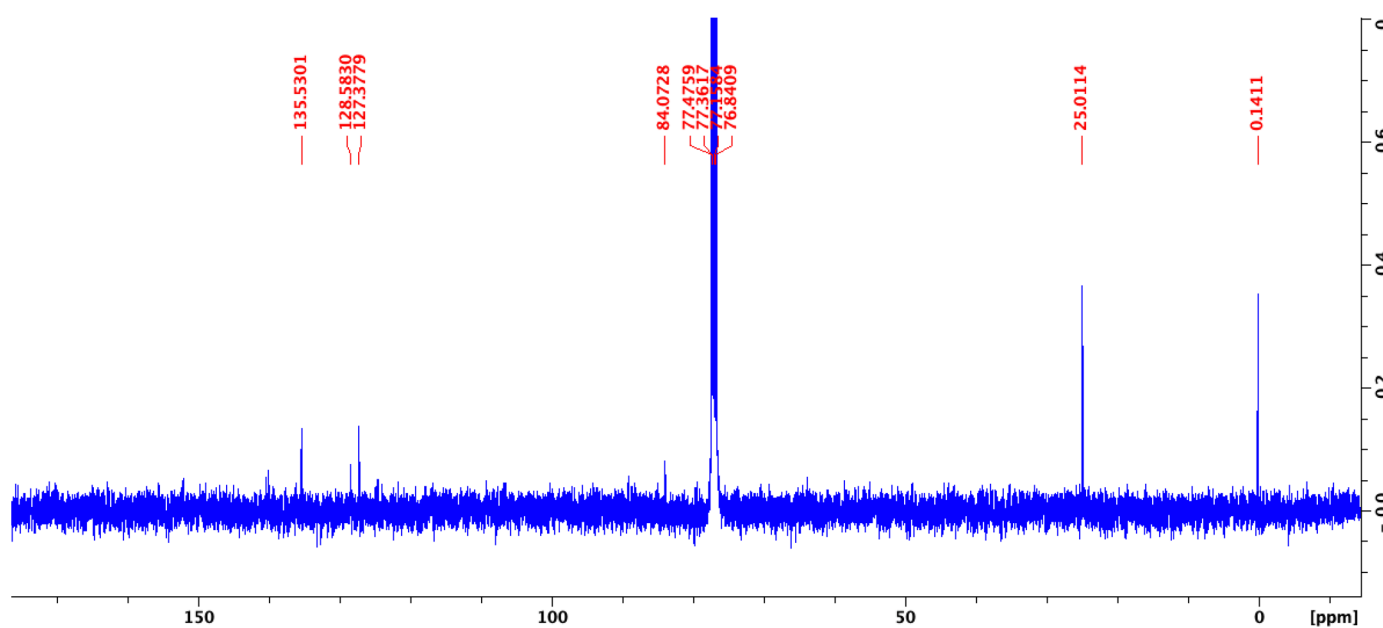

Figure S13.  $^{13}\text{C}$  NMR spectrum of para 8.
